1

2 Sewage Promotes *Vibrio vulnificus* Growth and Alters Gene Expression

3

4 James W. Conrad and Valerie J. Harwood\*

5 Department of Integrative Biology, University of South Florida, Tampa, Florida, USA

6

7 Running head: Sewage promotes *Vibrio vulnificus* growth

8

9 \*Address correspondence to Valerie J. Harwood, [vharwood@usf.edu](mailto:vharwood@usf.edu)

10

11 Key Words: wastewater, sewage, qPCR, virulence, gene expression, pathogen

12

13

14 **Abstract (250 words)**

15 *Vibrio vulnificus* is a naturally-occurring, potentially lethal pathogen found in coastal waters,  
16 fish, and shellfish. Sewage spills in coastal waters occur when infrastructure fails due to severe  
17 storms or age, and may affect bacterial populations by altering nutrient levels. This study  
18 investigated effects of sewage on clonal and natural *V. vulnificus* populations in microcosms.  
19 Addition of 1% sewage to estuarine water caused the density of a pure culture of *V. vulnificus*  
20 CMCP6 and a natural *V. vulnificus* population to increase significantly, whether measured by  
21 qPCR or culture. Changes in the transcription of six virulence- and survival-associated genes in  
22 response to sewage were assessed using continuous culture. Exposure to sewage affected  
23 transcription of genes that may be associated with virulence. Specifically, sewage modulated the  
24 oxidative stress response by altering superoxide dismutase transcription, significantly increasing  
25 *sodB* transcription while repressing *sodA*. Sewage also repressed transcription of *nptA*, which  
26 encodes a sodium-phosphate cotransporter. Sewage had no effect on *sodC* transcription or the  
27 putative virulence-associated genes *hupA* or *wza*. The effects of environmentally relevant levels  
28 of sewage on *V. vulnificus* populations and gene transcription suggest that sewage spills that  
29 impact warm coastal waters could lead to an increased risk of *V. vulnificus* infections.

30

31 **Importance (150 words max)**

32 *Vibrio vulnificus* infections have profound impacts such as limb amputation and death for  
33 individuals with predisposing conditions. The warming climate is contributing to rising *V.*  
34 *vulnificus* prevalence in waters that were previously too cold to support high levels of the  
35 pathogen. Climate change is also expected to increase precipitation in many regions, which puts  
36 more pressure on wastewater infrastructure and will result in more frequent sewage spills. The

37 finding that 1% wastewater in estuarine water leads to tenfold to 1000-fold greater *V. vulnificus*  
38 concentrations suggests that human exposure to oysters and estuarine water could have greater  
39 health impacts in the future. Further, wastewater had a significant effect on gene transcription  
40 and has the potential to affect virulence during the initial environment-to-host transition.

41

## 42 **Introduction**

43 Billions of gallons of sewage are discharged into the environment and recreational waters  
44 in the U.S. annually as a result of storms, infrastructure failure, and chronic leaks from aging  
45 infrastructure (1). Sewage contains an abundance of allochthonous human pathogens which pose  
46 a direct risk to individuals who contact the water during recreation or other activities such  
47 commercial fishing, and also contaminate aquatic fisheries (1–4). Sanitary sewer overflows  
48 (SSOs) that often occur after heavy rains overwhelm local infrastructure, and may impact  
49 microbial communities if sewage enters local water bodies. Sewage and runoff contain high  
50 levels of dissolved organic carbon (DOC), nitrogen (N), phosphate (P), heavy metals, and sub-  
51 inhibitory concentrations of antibiotics which contribute to eutrophication and degraded water  
52 quality (5, 6). These nutrient pulses could further degrade local water bodies by stimulating the  
53 growth of autochthonous bacteria including human pathogens such as the leading cause of  
54 seafood borne illness fatalities, *Vibrio vulnificus* (7).

55 The presence of nutrients, heavy metals, and pharmaceuticals in sewage, and in other  
56 forms of wastewater, can cause disturbances in the local bacterial and phytoplankton populations  
57 when they are released to the environment. Algal blooms have been observed following heavy  
58 storms, or sewage discharge, and have been correlated with proliferation of *Vibrio* spp. resulting  
59 from increased DOC and other nutrients (8–10). Pathogenic *Vibrio* spp., (e.g. *V. cholerae*, *V.*  
60 *parahaemolyticus*, and *V. vulnificus*) can also proliferate following these events (8, 11, 12). In  
61 contrast, vibrio concentrations did not correlate with fecal indicator bacteria, which signal  
62 pollution from sewage and other sources of fecal contamination (e.g. birds (13)), in Apalachicola  
63 Bay, FL (14). One study correlated *V. parahaemolyticus* levels with the amount of wastewater  
64 treatment plant (WWTP) effluent released into Narragansett Bay, RI (15).

65 *V. vulnificus* is an opportunistic human pathogen that is closely related to the pathogens  
66 *V. cholerae* and *V. parahaemolyticus* (16). Humans are typically infected with *V. vulnificus* after  
67 eating contaminated oysters, which can result in septicemia and up to a ~50% mortality (17).  
68 Exposure of wounds to estuarine water or animals (e.g. shellfish or fish) can result in cutaneous  
69 infections and necrotizing fasciitis, which may necessitate limb amputation (17). Naturally-  
70 occurring *V. vulnificus* populations consist of three major biotypes; biotype one causes the  
71 majority of human infections (18, 19). Within biotype one, *V. vulnificus* is grouped into  
72 environmentally-associated (16S rRNA A or *vcgE*) and clinically-associated (16S rRNA B or  
73 *vcgC*) genotypes. The 16S rRNA A/B and *vcgC/E* typing methods are both used frequently and  
74 have a high degree of concordance (20–23). The clinically associated-genotype 16S rRNA B  
75 genotype is more frequently isolated from human infections and is correlated with more severe  
76 disease outcomes compared to the environmentally-associated 16S rRNA A genotype (20, 23,  
77 24). Differential expression of genes by each genotype may contribute to the observed genotype  
78 bias in clinical specimens. The sodium phosphate cotransporter *nptA* is differentially expressed  
79 by *V. vulnificus* genotypes (25) and may support growth under changing phosphate  
80 concentrations as observed in *Staphylococcus aureus* (26).

81 Expression of virulence genes in bacteria has been shown to respond to environmental  
82 conditions including temperature (27–29), salinity (25, 30), carbon sources (31–33), nutrients  
83 (25), heavy metals (34), and antibiotics (33, 35, 36). Sewage represents a source of numerous  
84 organic carbon molecules (37) inorganic nutrients, and metals (38). Iron is found in high  
85 concentrations in wastewater and can be a limiting nutrient in seawater for algae (39, 40), but  
86 also is potentially toxic, inducing oxidative stress in bacteria (41, 42). *hupA* expression in *V.*  
87 *vulnificus* is important for iron acquisition during infections (43). Antioxidant-related changes in

88 gene expression (e.g. *sodA-C*) can promote survival and virulence under acid stress and  
89 phagocyte engulfment in *V. vulnificus*, *V. alginolyticus*, and *Salmonella enterica* (42, 44–46).  
90 Changing nutrient levels, resulting from sewage, can affect the expression of genes related to  
91 nutrient acquisition and contribute to virulence potential. Similarly, expression of a capsule (e.g.  
92 *wza*) increases survival of *V. vulnificus* in the presence of serum (47–49) and is affected by  
93 environmental conditions (e.g. temperature and oxygen availability) (50, 51).

94 Sewage could directly influence the probability of human infection by *V. vulnificus* if it  
95 stimulated growth of the pathogen. On the other hand, sewage could indirectly increase pathogen  
96 infectiousness by altering the expression of genes related to virulence and the environment-to-  
97 host transition through multiple mechanisms. This study’s purpose was to investigate the effects  
98 of sewage on *V. vulnificus* growth and gene transcription using both laboratory cultures and  
99 natural populations of bacteria present in estuarine water in Tampa Bay, FL. The objectives were  
100 to 1) determine if sewage can serve as a nutrient source for autochthonous *V. vulnificus*  
101 populations; and 2) determine if sewage alters the transcription of virulence- and survival-  
102 associated genes.

103

## 104 **Methods**

105 **Strains and culture conditions.** *Vibrio vulnificus* strain CMCP6 was maintained on Luria-  
106 Bertani agar (Difco). *V. vulnificus* CMCP6 broth cultures prepared for inocula in microcosm and  
107 gene transcription experiments were incubated for 20-24 h in Luria-Bertani (LB) broth at room  
108 temperature (22°C).

109

110 **Sample collection and processing.** Sewage influent was collected from Falkenburg Advanced  
111 Wastewater Treatment Plant, Tampa, FL, transported on ice, and held for a maximum of two  
112 hours before being frozen at -20°C. Sewage was held in the freezer for a maximum of one month  
113 prior to thawing and filter sterilization with a Rexeed 25-S hollow-fiber filter (Asahi Kasei).  
114 Estuarine water was collected from Ben T. Davis Beach (BTD) Tampa, FL 27°58'12.9''N,  
115 82°34'42.9''W (pH 7.9, salinity 16-22 ‰) and Hudson Beach, Hudson FL 28°21'46.3''N  
116 82°42'33.6''W (pH 7.8, salinity 20 ‰) and used to construct microcosms, or sterilized by hollow  
117 fiber filtration as above and frozen, within 4 h of collection.

118 **Assessing the effects of sewage on growth of *V. vulnificus* CMCP6.** The ability of sewage to  
119 serve as a nutrient source was assessed by incubating *V. vulnificus* CMCP6 in microcosms with  
120 and without sewage. *V. vulnificus* concentrations were measured by qPCR of the *vvhA* gene  
121 (Table 1) (52). All microcosms were prepared in triplicate. *V. vulnificus* CMCP6 inoculum was  
122 grown at room temperature for ~22 h in LB broth and diluted to  $\sim 10^3$  CFU/mL in phosphate  
123 buffered saline (pH 7.4) (53). A 100  $\mu$ L aliquot of diluted culture was added to each 20 mL  
124 microcosm to reach a starting concentration of  $\sim 10^1$  CFU/mL and incubated at 37°C with  
125 shaking at 150 rpm for ~22 h.

126 Effects of the macronutrients nitrogen, phosphorous, and organic carbon in sewage on *V.*  
127 *vulnificus* CMCP6 growth were investigated by preparing a defined modified M9 (MM9)  
128 medium lacking these macronutrients. MM9 was amended with sterile sewage to serve as the  
129 sole source of the missing nutrients to determine their effects on culture density. Control  
130 (nutrient-replete) microcosms contained 20 ml of MM9 media consisting of 50 mM tris HCl (pH  
131 7.5), 10 mM NH<sub>4</sub>Cl, 0.1 mM CaCl<sub>2</sub>, 1 mM MgSO<sub>4</sub>, 1 mM KH<sub>2</sub>PO<sub>4</sub>, 0.1 mM ferric citrate  
132 (C<sub>6</sub>H<sub>5</sub>FeO<sub>7</sub>), 10 ‰ NaCl, and 11.1 mM (2 g/L) glucose. A medium depleted of nitrogen,

133 phosphorous and carbon was prepared by omitting  $\text{NH}_4\text{Cl}$ ,  $\text{KH}_2\text{PO}_4$ , and glucose from MM9.  
134 Estuarine water from Hudson Beach, FL (pH 7.8, salinity 20 ‰) was sterilized using hollow-  
135 fiber filtration (Rexeed 25-S) for microcosms made with environmental water. Sewage-amended  
136 treatments received 1% (vol/vol) sterile sewage influent. An undiluted sterile sewage treatment  
137 was amended with NaCl to a salinity of 10 ‰. Twenty milliliters of culture, 1 mL for turbid  
138 cultures, were filtered through a 0.45  $\mu\text{m}$  nitrocellulose filter to concentrate bacteria. Membrane  
139 filters were stored at  $-80^\circ\text{C}$  until DNA could be extracted using a DNeasy Power Water kit  
140 (Qiagen) and bacteria were quantified using qPCR of the *vvhA* gene.

141

142 **Assessing the effect of sewage on the growth of autochthonous *V. vulnificus*.** The effects of  
143 nutrient amendment on culturable concentrations of autochthonous *V. vulnificus* populations in  
144 estuarine water was assessed in batch cultures. Microcosms (500 mL) were constructed in  
145 triplicate using estuarine water from BTB (pH 7.9, salinity 22 ‰). We used a control treatment  
146 (natural estuarine water only), a low-level glucose amendment (3.0 mg/L glucose)(54), and a  
147 sewage amendment (1% filter-sterilized sewage influent). Microcosms were incubated at  $30^\circ\text{C}$   
148 with shaking at 140 rpm for 20-24 h. Culturable *V. vulnificus* were enumerated using membrane  
149 filtration by filtering 1 mL of serially diluted culture through 0.45  $\mu\text{m}$  nitrocellulose membrane  
150 filters and plating on modified cellobiose-polymyxin b-colistin agar (mCPC) (55). Plates were  
151 incubated at  $37^\circ\text{C}$  for 22-24 h and then counted.

152

153 **Effects of sewage on virulence- and survival-associated genes.** Changes in transcription of six  
154 virulence- and survival-associated genes (*hupA*, *nptA*, *sodA-C*, *tufA*, and *wza*) by *V. vulnificus*  
155 CMCP6 in response to sewage were assessed using an Infors-HT II bioreactor in a chemostat



156 (continuous flow) configuration. Genes were selected based on their potential dual roles in  
157 survival in the environment and the human host, or known importance for virulence expression.  
158 Defined minimal medium containing 23.3 mM Na<sub>2</sub>HPO<sub>4</sub>, 11 mM KH<sub>2</sub>PO<sub>4</sub>, 9.35 mM NH<sub>4</sub>Cl,  
159 85.6 mM NaCl, 1 mM MgSO<sub>4</sub>, and 2.25 mM glucose (0.405 g/L) with pH adjusted to 7.5 was  
160 used as a growth medium. The 1 L culture vessel and 4 L reservoir were filled with medium and  
161 the bioreactor was set to pH 7.5, temperature 37°C, dissolved oxygen >70%, 150 rpm stir rate,  
162 and a flow rate of 3 L/d. The *V. vulnificus* CMCP6 inoculum was grown at room temperature for  
163 ~22 h in LB and 1 mL of culture was added to the bioreactor to reach a starting concentration of  
164 10<sup>6</sup> CFU/mL After inoculation, the bioreactor was run continuously for 48 h prior to sampling  
165 under control (no sewage added) conditions. Sampling under control conditions occurred thrice  
166 over the course of 4 h. After sampling under control conditions, the nutrient reservoir was  
167 replaced with minimal medium amended with 1% (vol/vol) sterile sewage and allowed to run for  
168 another 48 h. After 48 h, the sewage treatment was sampled thrice over the course of 4 h.

169 Immediately after each sample collection RNA was extracted using a Quick-RNA  
170 Miniprep Kit (Zymo) followed by a dnase treatment using a TURBO DNA-free Kit (Invitrogen).  
171 Briefly, RNA was diluted to 10 ng/μL and used for reverse transcriptase qPCR (RT-qPCR) of  
172 the following genes: *hupA*, *nptA*, *sodA-C*, *tufA*, and *wza* (Table 1). Thermo Scientific™ Verso™  
173 1-Step RT-qPCR Kits with low ROX (Thermo Scientific) was used for one step reverse  
174 transcription in an ABI 7500 qPCR thermocycler. Twenty microliter qPCR reactions consisted of  
175 1x Verso master mix, 1 μL enhancer per reaction, 0.2 μL Verso Enzyme per reaction, 0.15 μM of  
176 each primer (Table 1), 2 μL of template RNA (10 ng/ μL) per reaction, and nuclease free water.  
177 Cycling conditions were as follows: 1 cycle of 50°C for 15 min followed by 1 cycle of 95°C for  
178 15 min followed by 40 cycles of 95°C for 15 s and 60°C for 30 s. Dnase treatment was verified

179 using a no enzyme control (reactions lacking Verso Enzyme). Fold gene transcription was  
180 calculated using the  $2^{-\Delta\Delta C_T}$  method, which normalizes transcription to a reference gene, (56) with  
181 *tufA* serving as the reference gene (57).

182

183 **Statistical analyses.** Statistical analyses on culturable bacterial concentrations, qPCR, and RT-  
184 qPCR data were performed in R v3.6.3 and Graphpad Prism v8. ANOVA followed by Tukey's  
185 honest significance tests was performed using Graphpad and the package multcomp in R.

186

## 187 **Results**

188 **Sewage promotes *V. vulnificus* CMCP6 growth.** We sought to determine if sewage could  
189 support the growth of *V. vulnificus* CMCP6 in a minimal medium and in sterile estuarine water.  
190 Culture density in microcosms containing nutrient replete MM9 ( $4.67 \times 10^9$  GC/100 mL) was not  
191 significantly different from MM9 with 1% added sewage ( $5.47 \times 10^9$  GC/100 mL) or from  
192 cultures grown in undiluted sewage ( $5.33 \times 10^9$  GC/100 mL) (Fig. 1). *V. vulnificus* CMCP6 in  
193 nutrient depleted MM9 (lacking a nitrogen, phosphorus and carbon source) amended with 1%  
194 sewage (NPC lim + 1% Sew) reached a density of  $6.81 \times 10^7$  GC/100 mL, while *V. vulnificus*  
195 concentrations in NPC-depleted medium without sewage were below the limit of detection ( $< 10$   
196 GC/mL) (data not shown). The addition of 1% sterile sewage to sterile estuarine water caused a  
197 significant  $1.16 \log_{10}$  GC/100 mL increase in *V. vulnificus* density to  $4.21 \times 10^7$  GC/100 mL  
198 compared to the sterile estuarine water ( $2.88 \times 10^6$  GC/100 mL) (Fig. 1). *V. vulnificus* levels in  
199 nutrient-depleted MM9 amended with sewage were not significantly different than those in  
200 sterile estuarine water amended with sewage.

201

202 **Sewage supports the growth of natural *V. vulnificus* populations.** We explored the potential  
203 for sewage to increase the density of a natural population of *V. vulnificus* by incubating  
204 autochthonous populations in natural estuarine water  $\pm$  1% sterile sewage for 24 h (Fig. 2). The  
205 effect of 3.0 mg/L (16.7  $\mu$ M) glucose, used to simulate organic carbon resulting from primary  
206 production, on the growth of *V. vulnificus* was also examined. The autochthonous *V. vulnificus*  
207 population grew to a significantly greater density as measured by culture in the sewage-amended  
208 microcosms in 24 h; i.e.  $2.17 \times 10^6$  CFU/100 mL in the sewage treatment compared to  $8.49 \times 10^2$   
209 CFU/100 mL in the un-amended estuarine water (Fig. 2). Added glucose caused no significant  
210 difference in culturable *V. vulnificus* concentrations compared to the un-amended estuarine water  
211 (Fig. 2).

212  
213 **Effects of sewage on gene transcription.** The possibility that compounds in sewage could affect  
214 the transcription of virulence- and survival-associated genes was tested using *V. vulnificus*  
215 CMCP6. *V. vulnificus* CMCP6 was maintained as an actively growing culture using a bioreactor  
216 in a chemostat configuration with nutrient replete medium. A stable continuous culture was  
217 established and sampled before being exposed to 1% sewage to determine changes in the  
218 transcription of virulence- and survival-associated genes (*sodA-C*, *hupA*, *nptA*, and *wza*). Sewage  
219 exposure significantly increased Fe SOD (*sodB*) transcription 2.7-fold over the control (Fig. 3).  
220 Conversely, transcription of *sodA*, which encodes Mn SOD, significantly decreased 5.4 fold  
221 upon exposure to sewage. *nptA* transcription was a significant 2.1-fold lower in the sewage  
222 treatment compared to the control. Changes in transcription of the remaining genes (*sodC*  
223 encoding the CuZn SOD, *hupA*, and *wza*) were not significant. While not significant at  $\alpha=0.05$ ,  
224 sewage appeared to repress *hupA* ( $p = 0.08$ ) transcription.

225

## 226 **Discussion**

227 Contamination of surface waters by sewage and storm water is known to endanger human  
228 health by increasing the probability of human exposure to allochthonous pathogens, and also to  
229 degrade water quality through nutrient loading (58–60); however, the possibility that sewage  
230 promotes increased levels of autochthonous aquatic pathogens by providing nutrients has been  
231 infrequently addressed. Sewage is often accidentally discharged into the environment during  
232 heavy rains where storm drains and sewer systems are connected, or where leakage from aged  
233 septic and sewer systems occurs, resulting in millions of gallons of sewage contaminating the  
234 environment annually (61, 62). Demonstrated increases in *Vibrio* spp. concentrations following  
235 storm events have been attributed to reduced salinity and mixing of shallow and deep waters (8,  
236 12, 63). However, the effects of sewage on autochthonous, pathogenic *Vibrio* spp. (e.g. *V.*  
237 *cholerae*, *V. parahaemolyticus*, and *V. vulnificus*) are largely unexplored and may represent a  
238 threat to human health, as higher concentrations of pathogenic *Vibrio* spp. significantly increase  
239 the risk of infections (64).

240 This study demonstrated that environmentally relevant sewage levels can significantly  
241 increase *V. vulnificus* density. The concentration of 1% sewage used here was selected as it  
242 represents a reasonable level of contamination following a recent, local sewage spill or chronic  
243 contamination. We base this assessment from a review of human associated *Bacteroides* genetic  
244 marker (HF183) which is commonly used to identify sewage contamination of surface waters  
245 (58, 65). HF183 levels of  $6.31 \times 10^5$  -  $6.15 \times 10^6$  GC/100 mL have been measured in sewage  
246 diluted 100-fold (1%) (66–68) which is within the range of  $1.80 \times 10^3$  -  $6.30 \times 10^7$  GC/100 mL  
247 observed in moderately to severely impacted surface waters (13, 68–71). A low level of organic

248 carbon (3.0 mg/L) was tested to simulate the level of organic carbon from primary production in  
249 an estuary (mean 3.07 mg/L) (54) but did not affect the observed population density in this study.

250 We demonstrated that sewage promotes proliferation of both pure cultures of *V.*  
251 *vulnificus* CMCP6 and natural *V. vulnificus* populations. Growth of *V. vulnificus* CMCP6 in  
252 sterile estuarine water without sewage resulted in a population density of  $\sim 10^6$  GC/100 ml,  
253 which is at the upper level of previous reports from Gulf of Mexico coastal waters (72, 73). The  
254 addition of 1% sewage in this study increased CMCP6 density by an order of magnitude,  
255 bringing it above the range observed in the aforementioned reports. Likewise, levels of natural *V.*  
256 *vulnificus* populations measured by culture in this study ( $\sim 10^3$  CFU/100 ml) were similar to  
257 previously observed levels (72), but, with the addition of sewage, increased over three orders of  
258 magnitude to levels rarely reported in environmental waters. The increase in natural populations  
259 associated with sewage amendment was corroborated in a continuous culture experiment where  
260 *V. vulnificus* was measured by qPCR of *vvhA* (74). *V. vulnificus* concentrations increased over  
261 one hundred fold in 24 h following sewage addition, from  $\sim 10^5$  GC/100 ml to  $\sim 10^7$  GC/100 ml.  
262 While one would expect qPCR measurements to be higher than culture measurements, the  
263 magnitude difference in the effect of sewage among the different experiments was unexpected.  
264 It is possible that measurements of density of the autochthonous population by culture  
265 underestimated the initial quantity of *V. vulnificus* due to the presence of viable but  
266 nonculturable *V. vulnificus*, but the addition of sewage not only promoted proliferation, but also  
267 shifted a greater proportion of the cells to culturability (52).

268 Based on the growth-promoting effects of sewage, and presence of bioactive compounds,  
269 we hypothesized that sewage would induce the transcription of several virulence- and survival-  
270 associated genes which may facilitate the environment-to-host transition. Sewage represents a

271 rich source of iron with concentrations ranging from 1.9-17.3 mg/L to >70000 mg/kg in sludge  
272 (38, 75). Elevated *sodB* (Fe SOD) transcription and *sodA* (Mn SOD) repression observed here is  
273 consistent with *fur*-mediated gene regulation in the presence of iron observed in *V. vulnificus* and  
274 *Escherichia coli* (44, 76). Fe SOD expression has been shown to be more important for virulence  
275 expression in mice than either *sodC* (CuZn SOD) or *sodA* (42). Expression of Fe SOD was also  
276 demonstrated to be an important virulence factor in fish infections in the opportunistic human  
277 pathogen *Vibrio alginolyticus* (46). Elevated transcription of *sodB* may facilitate the  
278 environment-to-host transition and could be an important virulence factor in human infections.  
279 While not observed here, *hupA* transcription increases upon exposure to human serum, allowing  
280 for iron acquisition (77). Free iron provided by sewage may have repressed transcription of *hupA*  
281 (29). *nptA* transcription was repressed in response to sewage. Phosphorus concentrations in  
282 sewage are approximately three orders of magnitude higher (3 mg/L or 31.6  $\mu$ M (78)) than those  
283 in estuarine water in Florida Bay (0.02-0.04  $\mu$ M (79)), which could explain the effect on  
284 phosphate transporter transcription. However, it was reported that phosphate concentration does  
285 not affect *nptA* (25), and it is possible that other or multiple constituents of sewage contributed to  
286 the observed effect. While the function of *nptA* in *V. vulnificus* pathogenesis is not well  
287 understood, its expression under varying environmental conditions (25) may support the  
288 transition to a human host, as proposed for *nptA* expression in *Staphylococcus aureus* (26), by  
289 enabling rapid phosphate uptake in the new environment.

290 This study has shown that sewage represents a threat to human health beyond direct  
291 deposition of allochthonous pathogens. Sewage can alter the autochthonous *V. vulnificus*  
292 population in multiple ways by stimulating growth and increasing the transcription of multiple  
293 virulence associated genes. The response of *V. vulnificus* and other pathogenic *Vibrio* species to

294 sewage may also enable better modeling of human health risks. Studies comparing opportunistic  
295 pathogens to obligate pathogens will be important to understand the broader impacts of sewage  
296 on waterborne pathogens and risk to human health.

297

## 298 **Acknowledgements**

299 We thank Dr. Anita Wright for providing us with a *V. vulnificus* CMCP6 culture, funding from  
300 the Porter Family Foundation (USF), and the Aylesworth Scholarship (USF).

301

## 302 **References**

303

- 304 1. U.S. Environmental Protection Agency. 2004. Report to congress on impacts and control  
305 of combined sewer overflows and sanitary sewer overflows fact sheet.
- 306 2. Belkin S, Colwell RR. 2005. Oceans and health: Pathogens in the marine  
307 environment. Oceans and Health: Pathogens in the Marine Environment. Springer  
308 Science+Business Media, Inc., New York.
- 309 3. U.S. Environmental Protection Agency. 2012. EPA recreational water quality criteria. 1–  
310 63.
- 311 4. Wolf S, Hewitt J, Greening GE. 2010. Viral multiplex quantitative PCR assays for  
312 tracking sources of fecal contamination. Appl Environ Microbiol 76:1388–1394.
- 313 5. El Marghani A, Pradhan A, Seyoum A, Khalaf H, Ros T, Forsberg LH, Nermark T,  
314 Osterman L, Wiklund U, Ivarsson P, Jass J, Olsson PE. 2014. Contribution of  
315 pharmaceuticals, fecal bacteria and endotoxin to the inflammatory responses to inland  
316 waters. Sci Total Environ 488–489:228–235.
- 317 6. Baker-Austin C, Wright MS, Stepanauskas R, McArthur J V. 2006. Co-selection of  
318 antibiotic and metal resistance. Trends Microbiol. Elsevier Current Trends.

- 319 7. Gulig PA, Bourdage KL, Starks AM. 2005. Molecular pathogenesis of *Vibrio vulnificus*. J  
320 Microbiol 43:118–131.
- 321 8. Thickman JD, Gobler CJ. 2017. The ability of algal organic matter and surface runoff to  
322 promote the abundance of pathogenic and non-pathogenic strains of *Vibrio*  
323 *parahaemolyticus* in Long Island Sound, USA. PLoS One 12:e0185994.
- 324 9. Hsieh JL, Fries JS, Noble RT. 2007. *Vibrio* and phytoplankton dynamics during the  
325 summer of 2004 in a eutrophying estuary. Ecol Appl 17:S102–S109.
- 326 10. Greenfield DI, Gooch Moore J, Stewart JR, Hilborn ED, George BJ, Li Q, Dickerson J,  
327 Keppler CK, Sandifer PA. 2017. Temporal and environmental factors driving *Vibrio*  
328 *vulnificus* and *V. parahaemolyticus* populations and their associations with harmful algal  
329 blooms in South Carolina detention ponds and receiving tidal creeks. GeoHealth 1:306–  
330 317.
- 331 11. Hsieh JL, Fries JS, Noble RT. 2008. Dynamics and predictive modelling of *Vibrio* spp. in  
332 the Neuse River Estuary, North Carolina, USA. Environ Microbiol 10:57–64.
- 333 12. Wetz J, Blackwood A, Fries J, Williams Z, Noble R. 2008. Trends in total *Vibrio* spp. and  
334 *Vibrio vulnificus* concentrations in the eutrophic Neuse River Estuary, North Carolina,  
335 during storm events. Aquat Microb Ecol 53:141–149.
- 336 13. Nguyen KH, Senay C, Young S, Nayak B, Lobos A, Conrad J, Harwood VJ. 2018.  
337 Determination of wild animal sources of fecal indicator bacteria by microbial source  
338 tracking (MST) influences regulatory decisions. Water Res 144:424–434.
- 339 14. Koh EGL, Huyn JH, LaRock PA. 1994. Pertinence of indicator organisms and sampling  
340 variables to *Vibrio* concentrations. Appl Environ Microbiol 60:3897–3900.
- 341 15. Watkins WD, Cabelli VJ. 1985. Effect of fecal pollution on *Vibrio parahaemolyticus*



- 342 densities in an estuarine environment. *Appl Environ Microbiol* 49.
- 343 16. Thompson CC, Vicente ACP, Souza RC, Vasconcelos ATR, Vesth T, Alves N, Ussery  
344 DW, Iida T, Thompson FL. 2009. Genomic taxonomy of vibrios. *BMC Evol Biol* 9:1–16.
- 345 17. Horseman MA, Surani S. 2011. A comprehensive review of *Vibrio vulnificus*: An  
346 important cause of severe sepsis and skin and soft-tissue infection. *Int J Infect Dis*  
347 15:e157–e166.
- 348 18. Biosca EG, Amaro C, Larsen JL, Pedersen K. 1997. Phenotypic and genotypic  
349 characterization of *Vibrio vulnificus*: Proposal for the substitution of the subspecific taxon  
350 biotype for serovar. *Appl Environ Microbiol* 63:1460–1466.
- 351 19. Bisharat N, Cohen DI, Harding RM, Falush D, Crook DW, Peto T, Maiden MC. 2005.  
352 Hybrid *Vibrio vulnificus*. *Emerg Infect Dis* 11:30–35.
- 353 20. Gordon K V., Vickery MC, DePaola A, Staley C, Harwood VJ. 2008. Real-time PCR  
354 assays for quantification and differentiation of *Vibrio vulnificus* strains in oysters and  
355 water. *Appl Environ Microbiol* 74:1704–1709.
- 356 21. Rosche TM, Binder EA, Oliver JD. 2010. *Vibrio vulnificus* genome suggests two distinct  
357 ecotypes. *Environ Microbiol Rep* 2:128–132.
- 358 22. Çam S, Brinkmeyer R, Schwarz JR. 2019. Quantitative PCR enumeration of *vcgC* and  
359 16S rRNA type A and B genes as virulence indicators for environmental and clinical  
360 strains of *Vibrio vulnificus* in Galveston Bay oysters. *Can J Microbiol* 65:613–621.
- 361 23. Rosche TM, Yano Y, Oliver JD. 2005. A rapid and simple PCR analysis indicates there  
362 are two subgroups of *Vibrio vulnificus* which correlate with clinical or environmental  
363 isolation. *Microbiol Immunol* 49:381–389.
- 364 24. Thiaville PC, Bourdage KL, Wright AC, Farrell-Evans M, Garvan CW, Gulig PA. 2011.

- 365 Genotype is correlated with but does not predict virulence of *Vibrio vulnificus* biotype 1 in  
366 subcutaneously inoculated, iron dextran-treated mice. *Infect Immun* 79:1194–1207.
- 367 25. Staley C, Harwood VJ. 2014. Differential expression of a sodium-phosphate cotransporter  
368 among *Vibrio vulnificus* strains. *Microb Ecol* 67:24–33.
- 369 26. Kelliher JL, Radin JN, Grim KP, Solórzano PKP, Degnan PH, Kehl-Fie TE. 2018.  
370 Acquisition of the phosphate transporter NptA enhances *Staphylococcus aureus*  
371 pathogenesis by improving phosphate uptake in divergent environments. *Infect Immun* 86.
- 372 27. Alarcón Elvira F, Pardío Sedas VT, Martínez Herrera D, Quintana Castro R, Oliart Ros  
373 RM, López Hernández K, Flores Primo A, Ramírez Elvira K. 2020. Comparative survival  
374 and the cold-induced gene expression of pathogenic and nonpathogenic *Vibrio*  
375 *parahaemolyticus* from tropical eastern oysters during cold storage. *Int J Environ Res*  
376 *Public Health* 17:1836.
- 377 28. Mahoney JC, Gerding MJ, Jones SH, Whistler CA. 2010. Comparison of the pathogenic  
378 potentials of environmental and clinical *Vibrio parahaemolyticus* strains indicates a role  
379 for temperature regulation in virulence. *Appl Environ Microbiol* 76:7459–7465.
- 380 29. Oh MH, Lee SM, Lee DH, Choi SH. 2009. Regulation of the *Vibrio vulnificus hupA* gene  
381 by temperature alteration and cyclic AMP receptor protein and evaluation of its role in  
382 virulence. *Infect Immun* 77:1208–1215.
- 383 30. Jones MK, Warner E, Oliver JD. 2008. Survival of and in situ gene expression by *Vibrio*  
384 *vulnificus* at varying salinities in estuarine environments. *Appl Environ Microbiol* 74:182–  
385 7.
- 386 31. Kim SY, Lee SE, Kim YR, Kim CM, Ryu PY, Choy HE, Chung SS, Rhee JH. 2003.  
387 Regulation of *Vibrio vulnificus* virulence by the LuxS quorum-sensing system. *Mol*

- 388 Microbiol 48:1647–1664.
- 389 32. Kühn J, Finger F, Bertuzzo E, Borgeaud S, Gatto M, Rinaldo A, Blokesch M. 2014.
- 390 Glucose- but not rice-based oral rehydration therapy enhances the production of virulence
- 391 determinants in the human pathogen *Vibrio cholerae*. PLoS Negl Trop Dis 8:e3347.
- 392 33. Nucleo E, Steffanoni L, Fugazza G, Migliavacca R, Giacobone E, Navarra A, Pagani L,
- 393 Landini P. 2009. Growth in glucose-based medium and exposure to subinhibitory
- 394 concentrations of imipenem induce biofilm formation in a multidrug-resistant clinical
- 395 isolate of *Acinetobacter baumannii*. BMC Microbiol 9:1–14.
- 396 34. Alice AF, Naka H, Crosa JH. 2008. Global gene expression as a function of the iron status
- 397 of the bacterial cell: Influence of differentially expressed genes in the virulence of the
- 398 human pathogen *Vibrio vulnificus*. Infect Immun 76:4019–4037.
- 399 35. Baharoglu Z, Mazel D. 2011. *Vibrio cholerae* triggers SOS and mutagenesis in response
- 400 to a wide range of antibiotics: A route towards multiresistance. Antimicrob Agents
- 401 Chemother 55:2438–2441.
- 402 36. Weir EK, Martin LC, Poppe C, Coombes BK, Boerlin P. 2008. Subinhibitory
- 403 concentrations of tetracycline affect virulence gene expression in a multi-resistant
- 404 *Salmonella enterica* subsp. enterica serovar Typhimurium DT104. Microbes Infect
- 405 10:901–907.
- 406 37. Barker DJ, Stuckey DC. 1999. A review of soluble microbial products (SMP) in
- 407 wastewater treatment systems. Water Res. Elsevier Science Ltd.
- 408 38. Yost KJ, Wukasch R., Adams T., Michalczyk B. 1981. Heavy metal sources and flow a
- 409 municipal sewage system. Kokomo.
- 410 39. Wells ML, Price NM, Bruland KW. 1995. Iron chemistry in seawater and its relationship

- 411 to phytoplankton: a workshop report. *Mar Chem* 48:157–182.
- 412 40. Brand LE. 1991. Minimum iron requirements of marine phytoplankton and the  
413 implications for the biogeochemical control of new production. *Limnol Oceanogr*  
414 36:1756–1771.
- 415 41. Cornelis P, Wei Q, Andrews SC, Vinckx T. 2011. Iron homeostasis and management of  
416 oxidative stress response in bacteria. *Metallomics* 3:540–549.
- 417 42. Kang I-HH, Kim J-SS, Lee JK. 2007. The virulence of *Vibrio vulnificus* is affected by the  
418 cellular level of superoxide dismutase activity. *J Microbiol Biotechnol* 17:1399–1402.
- 419 43. Pajuelo D, Lee C-T Te, Roig FJ, Lemos ML, Hor L-II, Amaro C. 2014. Host-nonspecific  
420 iron acquisition systems and virulence in the zoonotic serovar of *Vibrio vulnificus*. *Infect*  
421 *Immun* 82:731–744.
- 422 44. Kim JS, Sung MH, Kho DH, Lee JK. 2005. Induction of manganese-containing  
423 superoxide dismutase is required for acid tolerance in *Vibrio vulnificus*. *J Bacteriol*  
424 187:5984–5995.
- 425 45. De Groote MA, Ochsner UA, Shiloh MU, Nathan C, McCord JM, Dinauer MC, Libby SJ,  
426 Vazquez-Torres A, Xu Y, Fang FC. 1997. Periplasmic superoxide dismutase protects  
427 *Salmonella* from products of phagocyte NADPH-oxidase and nitric oxide synthase. *Proc*  
428 *Natl Acad Sci U S A* 94:13997–14001.
- 429 46. Chen Y, Wu F, Pang H, Tang J, Cai S, Jian J. 2019. Superoxide dismutase B (*sodB*), an  
430 important virulence factor of *Vibrio alginolyticus*, contributes to antioxidative stress and  
431 its potential application for live attenuated vaccine. *Fish Shellfish Immunol* 89:354–360.
- 432 47. Williams TC, Ayrapetyan M, Ryan H, Oliver J. 2014. Serum survival of *Vibrio vulnificus*:  
433 Role of genotype, capsule, complement, cinical origin, and in situ incubation. *Pathogens*

- 434 3:822–832.
- 435 48. Wright AC, Simpson LM, Oliver JD, Morris JG. 1990. Phenotypic evaluation of acapsular  
436 transposon mutants of *Vibrio vulnificus*. *Infect Immun* 58:1769–73.
- 437 49. Wright AC, Powell JL, Kaper JB, Morris JG. 2001. Identification of a group 1-like  
438 capsular polysaccharide operon for *Vibrio vulnificus*. *Infect Immun* 69:6893–901.
- 439 50. Wright AC, Powell JL, Tanner MK, Ensor LA, Karpas AB, Morris JG, Sztein MB. 1999.  
440 Differential expression of *Vibrio vulnificus* capsular polysaccharide. *Infect Immun*  
441 67:2250–7.
- 442 51. Phippen BL, Oliver JD. 2015. Role of anaerobiosis in capsule production and biofilm  
443 formation in *Vibrio vulnificus*. *Infect Immun* 83:551–559.
- 444 52. Campbell MS, Wright AC. 2003. Real-time PCR analysis of *Vibrio vulnificus* from  
445 oysters. 69:7137–7144.
- 446 53. BAM R59: Phosphate-Buffered Saline (PBS), pH 7.4 | FDA.
- 447 54. Joshi ID, D'Sa EJ, Osburn CL, Bianchi TS, Ko DS, Oviedo-Vargas D, Arellano AR,  
448 Ward ND. 2017. Assessing chromophoric dissolved organic matter (CDOM) distribution,  
449 stocks, and fluxes in Apalachicola Bay using combined field, VIIRS ocean color, and  
450 model observations. *Remote Sens Environ* 191:359–372.
- 451 55. U.S. Food and Drug Administration. 2001. BAM Media M98: Modified Cellobiose-  
452 Polymyxin B-Colistin (mCPC) Agar | FDA. *Bacteriol Anal Man*.
- 453 56. Livak KJ, Schmittgen TD. 2001. Analysis of relative gene expression data using real-time  
454 quantitative PCR and the  $2^{-\Delta\Delta CT}$  method. *Methods* 25:402–408.
- 455 57. Gauthier JD, Jones MK, Thiaville P, Joseph JL, Swain RA, Krediet CJ, Gulig PA,  
456 Teplitski M, Wright AC. 2010. Role of GacA in virulence of *Vibrio vulnificus*.

- 457 Microbiology 156:3722–3733.
- 458 58. Harwood VJ, Staley C, Badgley BD, Borges K, Korajkic A. 2014. Microbial source  
459 tracking markers for detection of fecal contamination in environmental waters:  
460 Relationships between pathogens and human health outcomes. FEMS Microbiol Rev  
461 38:1–40.
- 462 59. McQuaig S, Griffith J, Harwood VJ. 2012. Association of fecal indicator bacteria with  
463 human viruses and microbial source tracking markers at coastal beaches impacted by  
464 nonpoint source pollution. Appl Environ Microbiol 78:6423–6432.
- 465 60. Sidhu JPS, Hodgers L, Ahmed W, Chong MN, Toze S. 2012. Prevalence of human  
466 pathogens and indicators in stormwater runoff in Brisbane, Australia. Water Res 46:6652–  
467 6660.
- 468 61. Ahmed W, Neller R, Katouli M. 2005. Evidence of septic system failure determined by a  
469 bacterial biochemical fingerprinting method. J Appl Microbiol 98:910–920.
- 470 62. Florida Department of Environmental Protection. 2017. Evaluation of sanitary sewer  
471 overflows and unpermitted discharges associated with hurricanes Hermine & Matthew.
- 472 63. Esteves K, Hervio-Heath D, Mosser T, Rodier C, Tournoud MG, Jumas-Bilak E, Colwell  
473 RR, Monfort P. 2015. Rapid proliferation of *Vibrio parahaemolyticus*, *Vibrio vulnificus*,  
474 and *Vibrio cholerae* during freshwater flash floods in French Mediterranean Coastal  
475 lagoons. Appl Environ Microbiol 81:7600–7609.
- 476 64. Dickinson G, Lim K ying, Jiang SC. 2013. Quantitative microbial risk assessment of  
477 pathogenic vibrios in marine recreational waters of Southern California. Appl Environ  
478 Microbiol 79:294–302.
- 479 65. Green HC, Haugland RA, Varma M, Millen HT, Borchardt MA, Field KG, Walters WA,

- 480 Knight R, Sivaganesan M, Kelty CA, Shanks OC. 2014. Improved HF183 quantitative  
481 real-time PCR assay for characterization of human fecal pollution in ambient surface  
482 water samples. *Appl Environ Microbiol* 80:3086–94.
- 483 66. Mayer RE, Reischer GH, Ixenmaier SK, Derx J, Blaschke AP, Ebdon JE, Linke R, Egle L,  
484 Ahmed W, Blanch AR, Byamukama D, Savill M, Mushi D, Cristóbal HA, Edge TA,  
485 Schade MA, Aslan A, Brooks YM, Sommer R, Masago Y, Sato MI, Taylor HD, Rose JB,  
486 Wuertz S, Shanks OC, Piringer H, Mach RL, Savio D, Zessner M, Farnleitner AH. 2018.  
487 Global distribution of human-associated fecal genetic markers in reference samples from  
488 six continents. *Environ Sci Technol* 52:5076–5084.
- 489 67. Senkbeil JK, Ahmed W, Conrad J, Harwood VJ. 2019. Use of *Escherichia coli* genes  
490 associated with human sewage to track fecal contamination source in subtropical waters.  
491 *Sci Total Environ* 686:1069–1075.
- 492 68. Hughes B, Beale DJ, Dennis PG, Cook S, Ahmed W. 2017. Cross-comparison of human  
493 wastewater-associated molecular markers in relation to fecal indicator bacteria and enteric  
494 viruses in recreational beach waters. *Appl Environ Microbiol* 83:28–45.
- 495 69. Seurinck S, Verdrievael M, Verstraete W, Siciliano SD. 2006. Identification of human fecal  
496 pollution sources in a coastal area: a case study at Oostende (Belgium). *J Water Health*  
497 4:167–175.
- 498 70. Ahmed W, Yusuf R, Hasan I, Goonetilleke A, Gardner T. 2010. Quantitative PCR assay  
499 of sewage-associated *Bacteroides* markers to assess sewage pollution in an urban lake in  
500 Dhaka, Bangladesh. *Can J Microbiol* 56:838–845.
- 501 71. Ahmed W, Payyappat S, Cassidy M, Besley C. 2019. Enhanced insights from human and  
502 animal host-associated molecular marker genes in a freshwater lake receiving wet weather

- 503 overflows. *Sci Rep* 9:1–13.
- 504 72. Chase E, Young S, Harwood VJ. 2015. Sediment and vegetation as reservoirs of *Vibrio*  
505 *vulnificus* in the Tampa Bay Estuary and Gulf of Mexico. *Appl Environ Microbiol*  
506 81:2489–2494.
- 507 73. Givens CE, Bowers JC, DePaola A, Hollibaugh JT, Jones JL. 2014. Occurrence and  
508 distribution of *Vibrio vulnificus* and *Vibrio parahaemolyticus* - potential roles for fish,  
509 oyster, sediment and water. *Lett Appl Microbiol* 58:503–510.
- 510 74. Conrad JW. 2020. Environmental influences on expression of virulence- and survival-  
511 associated genes and epigenetic modifications of DNA in *Vibrio vulnificus*. Doctoral  
512 dissertation, University of South Florida, Tampa, FL.
- 513 75. Nomura MM, Young RHF. 1974. Fate of heavy metals in the sewage treatment process.  
514 Hawaii Univ Water Resour Res Cent Tech Rep.
- 515 76. Niederhoffer EC, Naranjo CM, Bradley KL, Fee JA. 1990. Control of *Escherichia coli*  
516 superoxide dismutase (*sodA* and *sodB*) genes by the ferric uptake regulation (*fur*) locus. *J*  
517 *Bacteriol* 172:1930–1938.
- 518 77. Williams TC, Blackman ER, Morrison SS, Gibas CJ, Oliver JD. 2014. Transcriptome  
519 sequencing reveals the virulence and environmental genetic programs of *Vibrio vulnificus*  
520 exposed to host and estuarine conditions. *PLoS One* 9:1–27.
- 521 78. Wang L, Min M, Li Y, Chen P, Chen Y, Liu Y, Wang Y, Ruan R. 2010. Cultivation of  
522 green algae *Chlorella* sp. in different wastewaters from municipal wastewater treatment  
523 plant. *Appl Biochem Biotechnol* 162:1174–1186.
- 524 79. Cotner JB, Sada RH, Johengen T, Cavaletto JF, Gardner WS. 2000. Nutrient limitation of  
525 heterotrophic bacteria in Florida Bay. *Estuaries* 23:611–620.





| Target                            | Function                                    | Primer Name | Primer Sequence 5'-3'     | Reference  |             |
|-----------------------------------|---------------------------------------------|-------------|---------------------------|------------|-------------|
| <b>qPCR Primers</b>               |                                             |             |                           |            |             |
| <i>vvhA</i>                       |                                             | FqPCR       | TGTTTATGGTGAGAACGGTGACA   | (52)       | 529 qPCR    |
|                                   |                                             | RqPCR       | TTCTTTATCTAGGCCCCAAACTTG  |            |             |
| <b>Gene Transcription Primers</b> |                                             |             |                           |            |             |
| <i>hupA</i>                       | TonB-dependent heme and hemoglobin receptor | hupA_F1     | CATGTCCCGGATTGTCATAG      | This study | 530 and     |
|                                   |                                             | hupA_R1     | ACAAGGTAGCGCAAGAAG        |            | 531 RT-     |
| <i>nptA</i>                       | Sodium phosphate cotransporter              | qNptA2_F    | TTTCTCTTGGCCACGTACGCTGTA  | (38)       | 532 qPCR    |
|                                   |                                             | qNptA1_R    | GCCGAACATCATTTCCAAAGGAAGG |            | 532 qPCR    |
| <i>sodA</i>                       | Manganese superoxide dismutase              | sodA_F1     | CCCACGCGATTCAAGAAA        | This study | 533 primers |
|                                   |                                             | sodA_R1     | CACCCTCTTTGACCACTAAC      |            |             |
| <i>sodB</i>                       | Iron superoxide dismutase                   | FeSOD_F1    | TCATGTAGTCTGGACGTAGG      | This study | 534 used in |
|                                   |                                             | FeSOD_R1    | ACACCAATCACTGAAGAAGG      |            |             |
| <i>sodC</i>                       | Superoxide dismutase [CuZn] precursor       | CuZnSOD_F1  | AGATCGCCAAGGTGATTG        | This study | 535 this    |
|                                   |                                             | CuZnSOD_R1  | AGACGGCAAAGTGGTATTAG      |            |             |
| <i>tufA</i>                       | Elongation factor                           | tufA_F      | TTCCCAGGTGATGACCTACC      | (49)       | 536 study.  |
|                                   |                                             | tufA_R      | TAGATCGATTGCACGCTCTG      |            |             |
| <i>wza</i>                        | Capsular polysaccharide transporter         | wza_F       | AGACGATTTGGCTTACATGG      | (49)       | 537         |
|                                   |                                             | wza_R       | GGATAGATGTGAGCCGGGTA      |            |             |

538

539

540

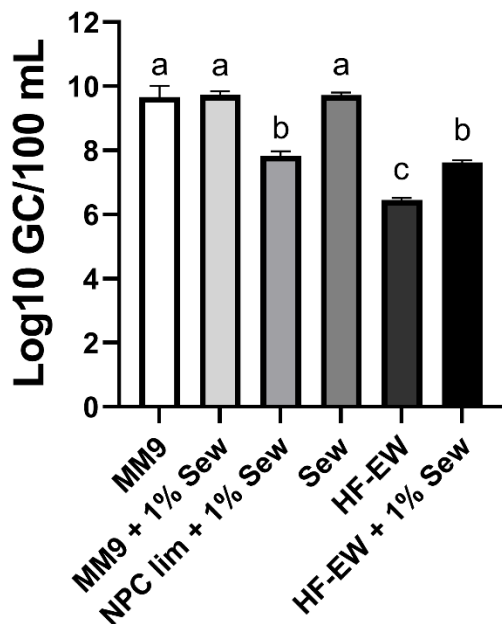

541

542 Figure 1. Effects of sewage on the density of *V. vulnificus* CMCP6 measured by qPCR of *vvhA*.

543 *V. vulnificus* CMCP6 was grown in the following media with or without 1% sterile sewage

544 added: nutrient replete minimal media (MM9), MM9 without added nitrogen, phosphorous, and

545 carbon (NPC lim), and sterilized estuarine water (HF-EW). It was also grown in undiluted sterile

546 sewage (Sew). Treatments listed with “+ 1% Sew” received a 1% (vol/vol) sterile sewage

547 amendment to growth medium. *V. vulnificus* density in the NPC limited media without sewage

548 was below the limit of detection (not shown). Error bars represent the standard deviation of the

549 mean between replicates and letter codes indicate a significant difference between treatments

550 when letters are not shared ( $p \leq 0.05$ ).

551

552

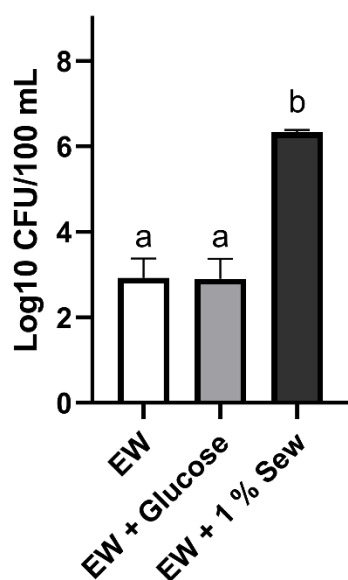

553

554

555 Figure 2. Density of an autochthonous *V. vulnificus* population measured by culture after 24  
556 hours of growth in natural estuarine water (EW) from Ben T. Davis Beach, FL. Treatments were  
557 unamended EW, EW amended with 3.0 mg/L glucose (EW + Glucose), and EW amended with  
558 1% sterile sewage (EW + 1% Sew). Error bars represent the standard deviation of the mean  
559 between replicates and letter codes indicate a significant difference between treatments when  
560 letters are not shared ( $p \leq 0.05$ ).

561

562

563

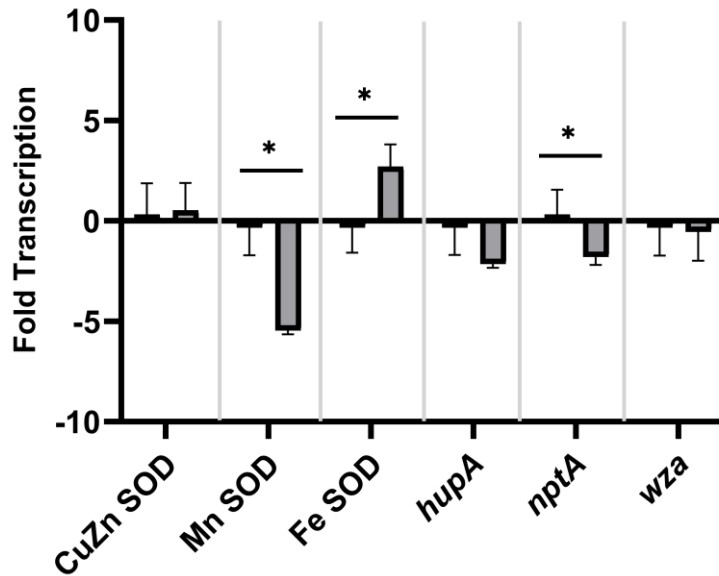

564

565 Figure 3. Changes in fold-transcription of virulence- and survival-associated genes in response to

566 amendment with 1% sewage was assessed by RT-qPCR: *sodC* (CuZn superoxide dismutase

567 (SOD)), *sodA* (Mn SOD), *sodB* (Fe SOD), *hupA*, *nptA* and *wza*. Cultures were grown using a

568 bioreactor in unamended minimal medium (control, □ on left) or in minimal medium + 1%

569 sterile sewage (sewage, ■ on right). Error bars represent the standard deviation of the mean

570 between replicates and asterisks represent a significant difference in the mean between

571 treatments (with or without sewage) ( $p \leq 0.05$ ).

572

573

574

575
